# Supplementary material
Source: Springer Nature journal article supplement (https://www.springermedizin.de/resource/supplementary/12968_2013_3357_MOESM4_ESM.pdf/9583488)

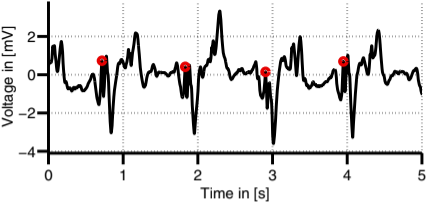

(a) Lead V3, D3(Hf)

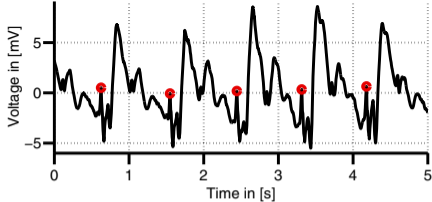

(b) Lead V3, D4(Hf)

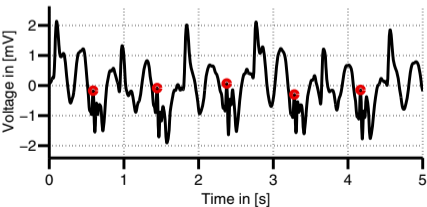

(c) Lead V3, D7(Hf)

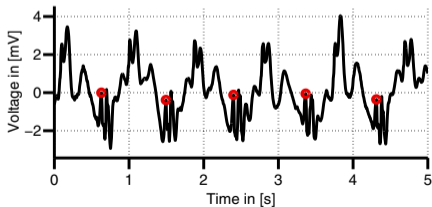

(d) Lead V3, D9(Hf)

Supplement: MOESM4 [file 9583488]
